# Supplementary material
Source: PubMed Central journal article supplement (PMC7093146)
Supplement: IAI.00012-20-s0001.pdf [file IAI.00012-20-s0001.pdf]

# Supplementary Figure 1

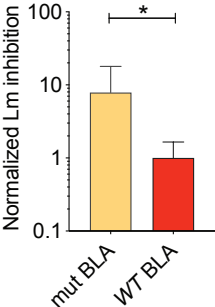

## Supplementary Figure 2

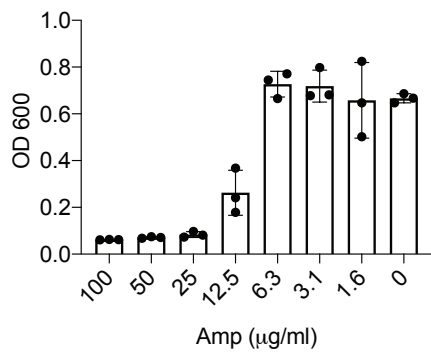

**Supplementary Figure 1. Confirmation of differential anti-listerial activity of cecal contents in *WT* BLA vs *mut* BLA *E. coli*-reconstituted *WT* mice.** C57Bl/6 mice were treated with a combination of metronidazole, neomycin and vancomycin for 3 days and reconstituted with either *WT* or *mut* BLA *E. coli*. 7 days following reconstitution mice were administered ampicillin in drinking water for 2 days, prior to sacrifice. *Lm* was cultured in serial dilutions of the cecal contents, and growth was assessed after o.n. incubation. To account for variability across experiments, *Lm* inhibition calculated as 1/first cecal dilution allowing *Lm* growth was normalized so that the average value for *WT* BLA ceca would be equal to 1 in each experiment (n=9-10 mice from 3 different experiments, shown is mean  $\pm$  SD, Mann-Whitney test: \*= $p < 0.05$ ).

**Supplementary Figure 2. Ampicillin sensitivity of *C. difficile*.** *C. difficile* was grown to stationary phase and inoculated in medium with different concentrations of ampicillin. Shown is OD600 measured after o.n. incubation at 37°C in anaerobic conditions (n=3 technical replicates).
